# Supplementary material
Source: publisher figshare collection journal article supplement (https://frontiersin.figshare.com/ndownloader/files/30873145)
Supplement: Supplementary file 1 [file 30873145]

Supporting Information for

**Stability and Thermoelasticity of Diaspore by Synchrotron X-ray Diffraction and Raman Spectroscopy**

Shijie Huang 1,2, Jingui Xu 3, Daorong Liu 4, Bo Li 1,2, Zhilin Ye 1,2, Wei Chen 1,2,5, Yunqian Kuang 1,2,6, Fangli Chi 7, Dawei Fan 1*, Maining Ma 8*, Wenge Zhou 1

1Key Laboratory of High-Temperature and High-Pressure Laboratory for High Temperature and High Pressure Study of the Earth’s Interior, Institute of Geochemistry, Chinese Academy of Sciences, Guiyang 550002, China

2University of Chinese Academy of Sciences, Beijing 100049, China

3Hawai'i Institute of Geophysics and Planetology, School of Ocean and Earth Science and Technology, University of Hawai'i at Manoa, Honolulu, HI, USA

4Zhejiang Geological Prospecting Institute of China Chemical Geology and Mine Bureau, Hangzhou 310002, China

5Guizhou Polytechnic of Construction, Guiyang 551400, China

6Bureau of natural resources and planning of Yongzhou, Yongzhou 425000, China

7Key Laboratory of Urban Sewage Treatment of Jilin Province, Changchun Institute of Technology, Changchun 130012, China

8Key Laboratory of Computational Geodynamics, College of Earth and Planetary Sciences, University of Chinese Academy of Sciences, Beijing 100049, China

* Corresponding author: Dawei Fan ([fandawei@vip.gyig.ac.cn](mailto:fandawei@vip.gyig.ac.cn) ) or Maining Ma ([mamn@ucas.ac.cn](mailto:mamn@ucas.ac.cn))

## Contents of this file

Table S1 to S3

Figure S1 to S2

TABLE S1 The chemical composition of diaspore (wt. %)

|  | Na2O | FeO | P2O5 | SiO2 | Cr2O3 | K2O | MgO | MnO | CaO | Al2O3 | NiO | TiO2 | Total |
| --- | --- | --- | --- | --- | --- | --- | --- | --- | --- | --- | --- | --- | --- |
| diaspore | 0.01 | 0.511 | - | - | 0.027 | - | - | - | 0.001 | 85.81 | 0.005 | 0.055 | 86.419 |
| - | 0.562 | 0.009 | - | 0.066 | - | 0.021 | 0.052 | 0.02 | 86.745 | 0.002 | - | 87.477 |
| 0.028 | 0.56 | - | - | - | - | - | 0.015 | - | 86.078 | - | 0.062 | 86.743 |
| - | 0.501 | 0.037 | 0.036 | 0.067 | 0.008 | - | - | - | 86.727 | - | 0.051 | 87.427 |

-: none

TABLE S2 The unit-cell parameters of diaspore at high pressures

| Pressure (GPa) | *a* (Å) | *b* (Å) | *c* (Å) | *V* (Å3) |
| --- | --- | --- | --- | --- |
| 0.26 (1) | 4.3968 (7) | 9.418 (2) | 2.8458 (12) | 117.85 (3) |
| 0.59 (2) | 4.3929 (7) | 9.413 (2) | 2.8433 (12) | 117.57 (3) |
| 1.23 (5) | 4.3872 (7) | 9.398 (2) | 2.8403 (12) | 117.11 (3) |
| 3.77 (15) | 4.3589 (7) | 9.351 (1) | 2.8279 (6) | 115.27 (3) |
| 4.57 (18) | 4.3511 (7) | 9.342 (1) | 2.8233 (6) | 114.76 (3) |
| 5.53 (22) | 4.3390 (7) | 9.321 (1) | 2.8195 (6) | 114.03 (3) |
| 6.67 (27) | 4.3294 (7) | 9.298 (1) | 2.8138 (6) | 113.27 (3) |
| 7.64 (31) | 4.3202 (6) | 9.280 (1) | 2.8088 (6) | 112.60 (3) |
| 8.56 (34) | 4.3105 (6) | 9.264 (1) | 2.8045 (6) | 111.99 (3) |
| 9.88 (39) | 4.2963 (7) | 9.249 (1) | 2.7965 (6) | 111.12 (3) |
| 11.23 (45) | 4.2866 (7) | 9.225 (1) | 2.7896 (6) | 110.31 (3) |
| 13.42 (51) | 4.2681 (7) | 9.191 (1) | 2.7794 (6) | 109.02 (3) |

The numbers in parentheses represent the error, for example, 0.26 (1) means 0.26 ± 0.01

TABLE S3 The unit-cell parameters of diaspore at high temperature and room pressure

| Temperature (K) | *a* (Å) | *b* (Å) | *c* (Å) | *V* (Å3) |
| --- | --- | --- | --- | --- |
| 297 | 4.3981 (1) | 9.4137 (4) | 2.84137 (7) | 117.640 (7) |
| 323 | 4.3982 (1) | 9.4151 (4) | 2.84175 (6) | 117.675 (6) |
| 353 | 4.3984 (1) | 9.4164 (4) | 2.84210 (6) | 117.713 (6) |
| 383 | 4.39918 (9) | 9.4177 (3) | 2.84252 (5) | 117.766 (5) |
| 413 | 4.3997 (1) | 9.4191 (4) | 2.84276 (5) | 117.808 (6) |
| 443 | 4.4005 (1) | 9.4208 (4) | 2.84319 (5) | 117.869 (5) |
| 473 | 4.40151 (9) | 9.4228 (3) | 2.84379 (5) | 117.946 (5) |
| 503 | 4.4024 (1) | 9.4237 (2) | 2.84426 (5) | 117.998 (4) |
| 533 | 4.4034 (1) | 9.4263 (3) | 2.84492 (5) | 118.088 (5) |
| 563 | 4.40437 (9) | 9.4275 (3) | 2.84539 (5) | 118.146 (5) |
| 593 | 4.4054 (1) | 9.4299 (4) | 2.84610 (5) | 118.235 (6) |
| 623 | 4.4064 (1) | 9.4315 (4) | 2.84673 (5) | 118.307 (6) |
| 653 | 4.40850 (9) | 9.4347 (3) | 2.84766 (5) | 118.442 (5) |
| 683 | 4.4093 (1) | 9.4354 (4) | 2.84804 (6) | 118.488 (6) |
| 713 | 4.4105 (1) | 9.4378 (4) | 2.84844 (5) | 118.568 (6) |

| (a) | (b) |
| --- | --- |
| 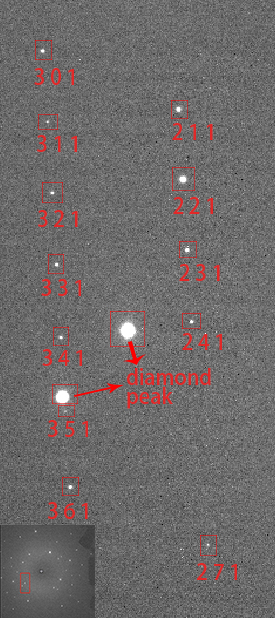 | 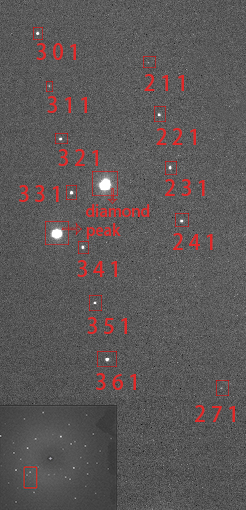 |

FIGURE S1. Single crystal X-ray diffraction patterns of diaspore at 0.26 GPa (a) and 13.42 GPa (b).

|  |  |
| --- | --- |
|  |  |

FIGURE S2. The representative Le Bail profile fitting patterns of diaspore at 298 K (a), 413 K (b), 533 K (c), and 713 K (d). Observed spectra (black lines), fitted spectra (red solid lines), difference plots (blue solid lines), and Bragg peak positions (tick marks) are shown.
